# Supplementary material for: Identification of m7G-Related LncRNA Signature for Predicting Prognosis and Evaluating Tumor Immune Infiltration in Pancreatic Adenocarcinoma
Source: Diagnostics (Basel). 2023 May 11;13(10):1697. doi: 10.3390/diagnostics13101697 (PMC10217316; doi:10.3390/diagnostics13101697)
Supplement: Supplementary file 1 [file diagnostics-13-01697-s001.zip]

Archive with 7 entries (7 files):
- supplementary files/Figure S1.tif
- supplementary files/Figure S2.tif
- supplementary files/figure S3.tif
- supplementary files/Figure S4.tif
- supplementary files/legend.pdf
- supplementary files/Table S1.xlsx
- supplementary files/Table S2 .xlsx
