# Supplementary material for: Identification of m7G-Related LncRNA Signature for Predicting Prognosis and Evaluating Tumor Immune Infiltration in Pancreatic Adenocarcinoma
Source: Diagnostics (Basel). 2023 May 11;13(10):1697. doi: 10.3390/diagnostics13101697 (PMC10217316; doi:10.3390/diagnostics13101697)
Supplement: Supplementary file 1 [file diagnostics-13-01697-s001.zip › supplementary files/Table S1.xlsx]

## Sheet: Sheet1
Table S1 The primer sequences involved in the research
lncRNAs	primers
SNHG8	F	GCGAAGTTTATTCAGCATCCG
	R	AAAATAGGTGTCCTGATAACTTCCAG
U62317.1	F	ATGCCCAGTCATTATCACATAACC
	R	GATCTACATTCAGGTCCTAGTGCAG
MEG9	F	CACTGGTTGCCTCTATTTGGG
	R	GCCTGATCTCTGCCTTCTCAAG
PTOV1-AS2	F	TGTGACCTAACACCAGCCACC
	R	CCTTTATGTGGCACCAACTGTG
LINC02086	F	TTAAGGCCAGATTTCTCCCATC
	R	GGGTGGAGAGGGTTTTGAAAAG
AC090617.5	F	GGCAACTATGTCTGAGGGCTAAA
	R	CCTGCCTCTGCAAGACAAGAA
UCA1	F	GCCATATGAAGACACCCTAGCTG
	R	GGTGTGCTATAAATGACCGGGTAG
AC136475.3	F	CCATAGGTTGGATGCTGTGTGG
	R	CCCAGCACAGGTGAGGACG
RPARP-AS1	F	GCTGAGTCAGAGGCAGAGTGATG
	R	GCTCATGACCGTCTTCCGTATTC
AC245041.2	F	CAATGGAATGGTAGCAGACAATAAA
	R	CTTTCATTCAGGAACACGATTCAG
AP000892.2	F	TGGACCAGTCCTGCATCGTG
	R	ACCTTTATTATCCCTCACGCCC
AC098613.1	F	GGGTCCTGACCCTCTAATGCG
	R	CCTGGTCCCCGTATTGAATCAG
GAPDH	F	GTCTCCTCTGACTTCAACAGCG
	R	ACCACCCTGTTGCTGTAGCCAA
