# Supplementary material for: Identification of m7G-Related LncRNA Signature for Predicting Prognosis and Evaluating Tumor Immune Infiltration in Pancreatic Adenocarcinoma
Source: Diagnostics (Basel). 2023 May 11;13(10):1697. doi: 10.3390/diagnostics13101697 (PMC10217316; doi:10.3390/diagnostics13101697)
Supplement: Supplementary file 1 [file diagnostics-13-01697-s001.zip › supplementary files/Table S2 .xlsx]

## Sheet: Sheet1
Table S2 The sequences of siRNA
siRNA		Sequence(5'to3')
si-SNHG8-1	sense	AGGUGGUCCGUGAUAAUUAAATT
	antisense	UUUAAUUAUCACGGACCACCUTT
si-SNHG8-2	sense	AUUACGAUGGAUGAUGGAAACAUATT
	antisense	UAUGUUUCCAUCAUCCAUCGUAAUTT
